# Supplementary material
Source: PubMed Central journal article supplement (PMC8935959)

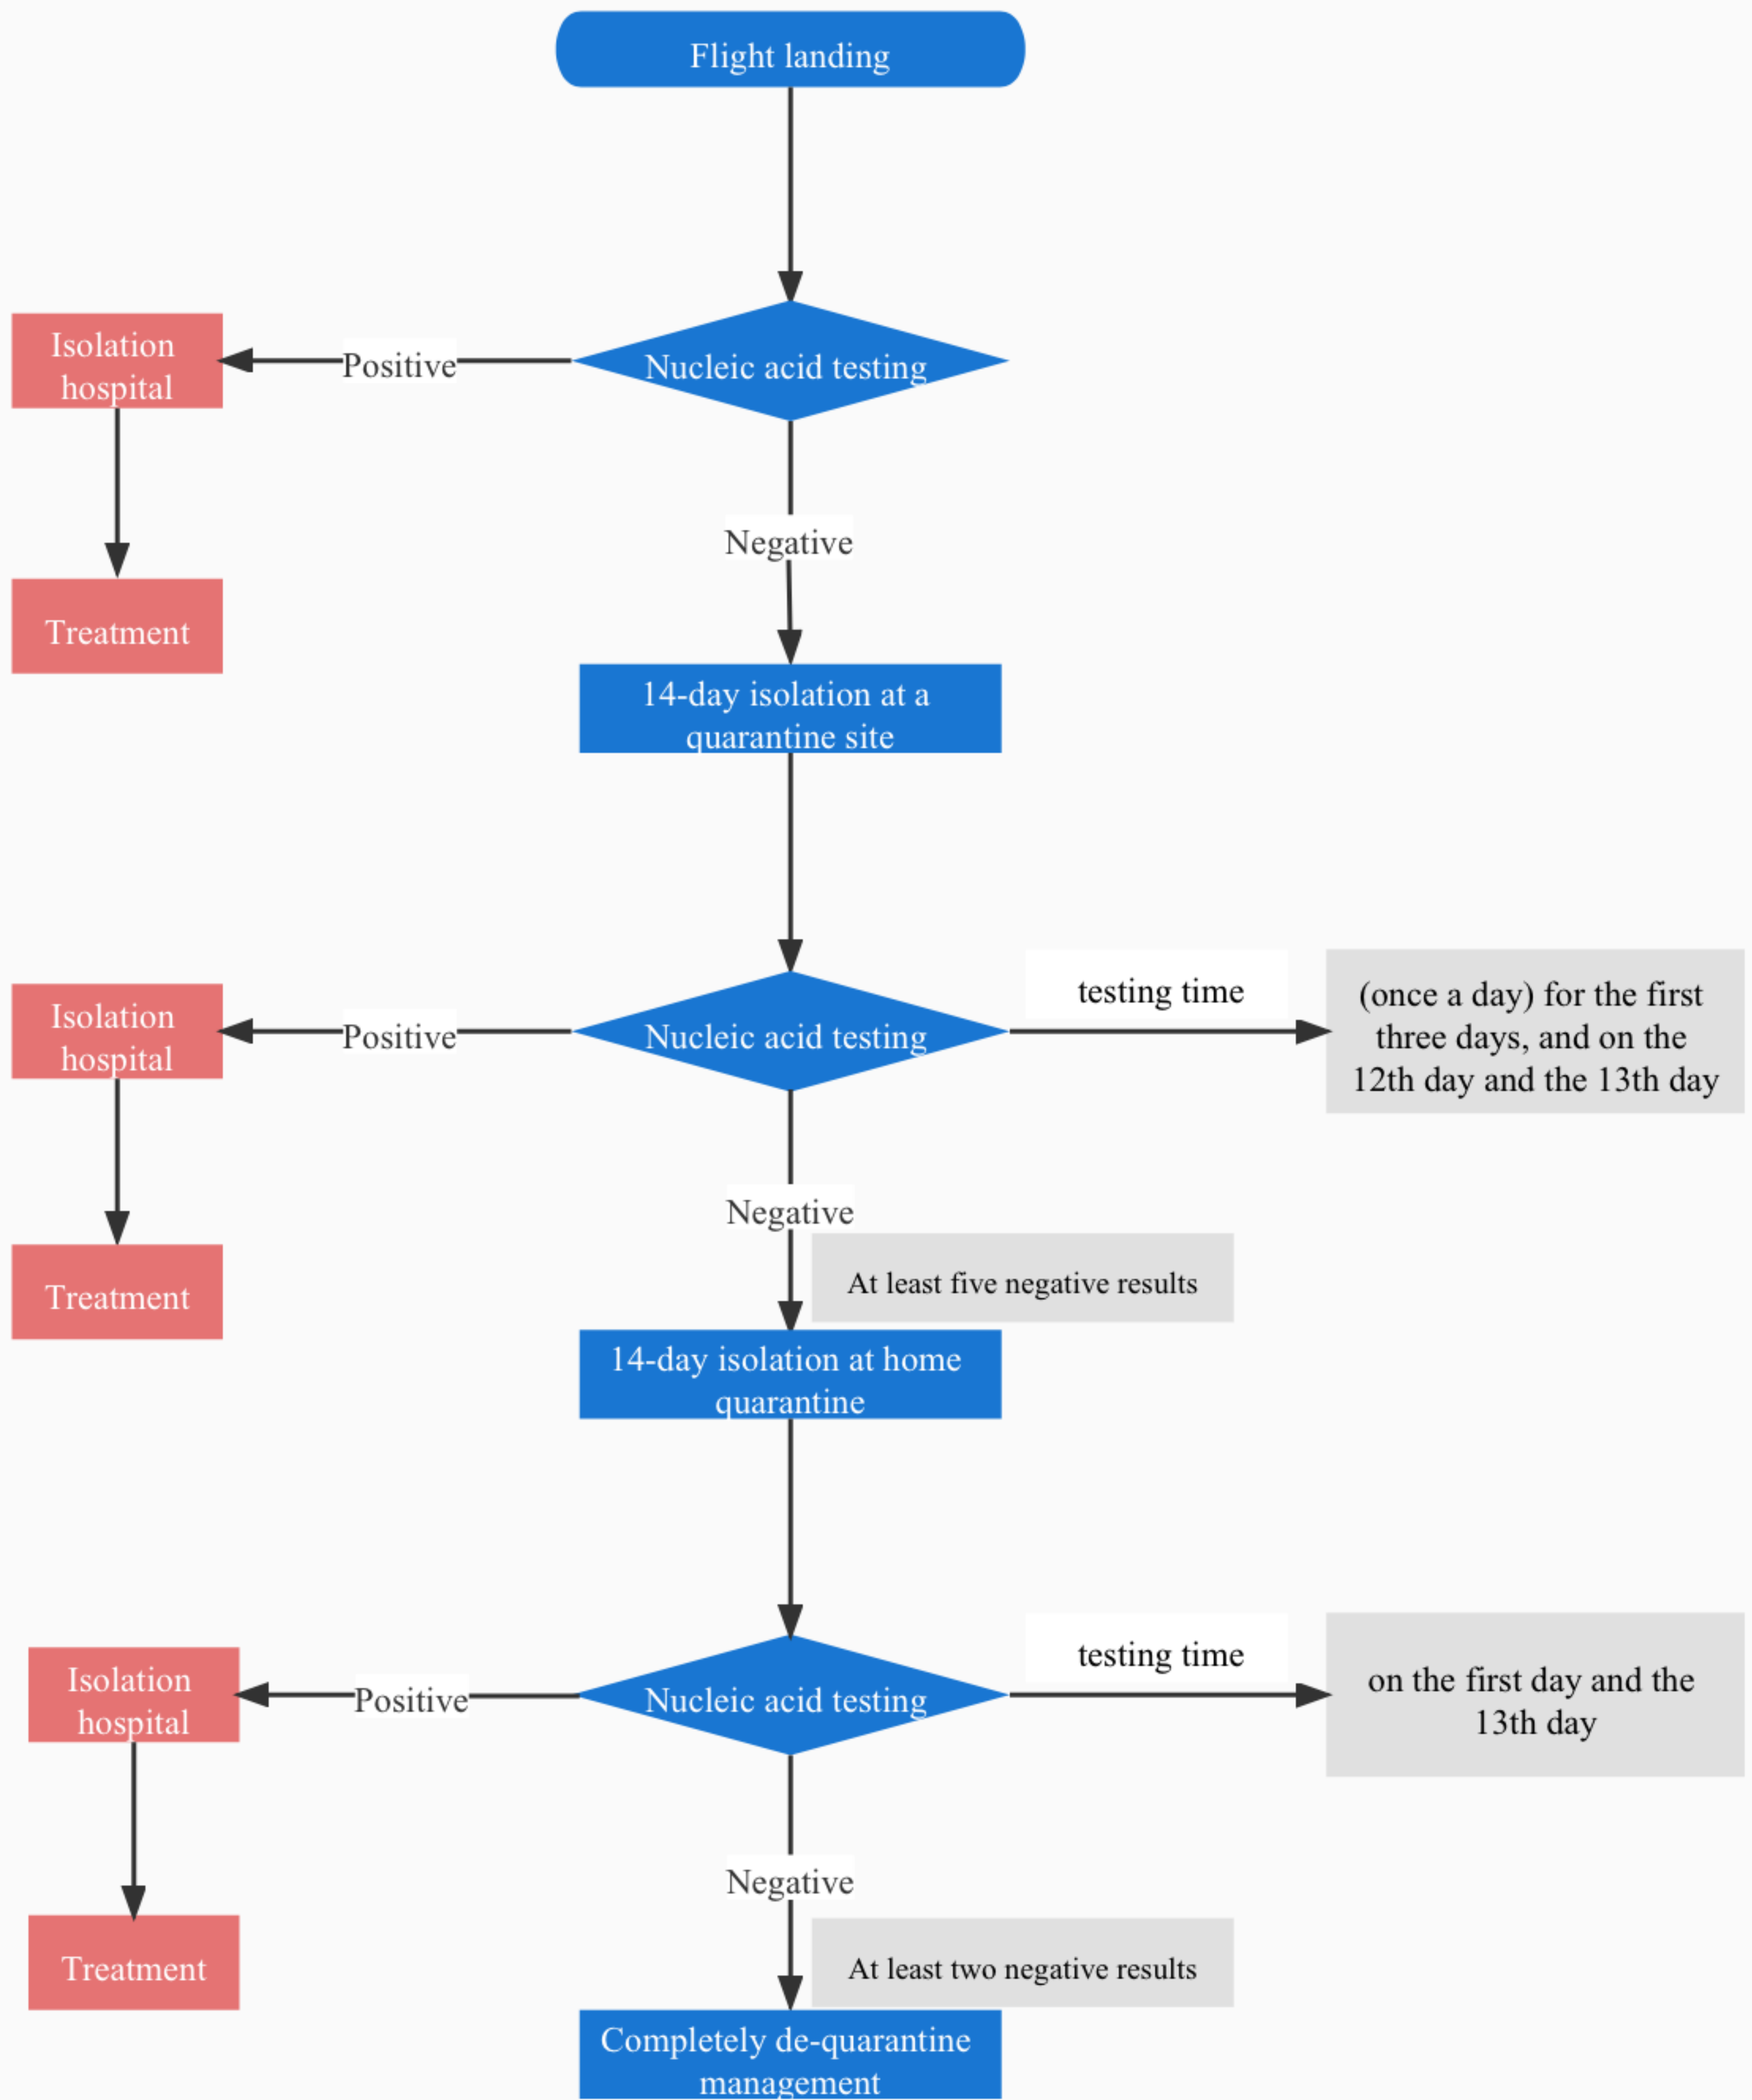

**Supplementary Figure 1: Epidemic prevention management process for inbound personnel**

Supplement: mmc1.pdf [file mmc1.pdf]
